# Supplementary material for: Efficient generation of mouse models of human diseases via ABE- and BE-mediated base editing
Source: PubMed Central journal article supplement (PMC6002399; doi:10.1038/s41467-018-04768-7), 2018-06-14
Supplement: 41467_2018_4768_MOESM1_ESM.pdf [file 41467_2018_4768_MOESM1_ESM.pdf]

# **Efficient generation of mouse models of human diseases via ABE- and BE-mediated base editing**

## **SUPPLEMENTARY INFORMATION**

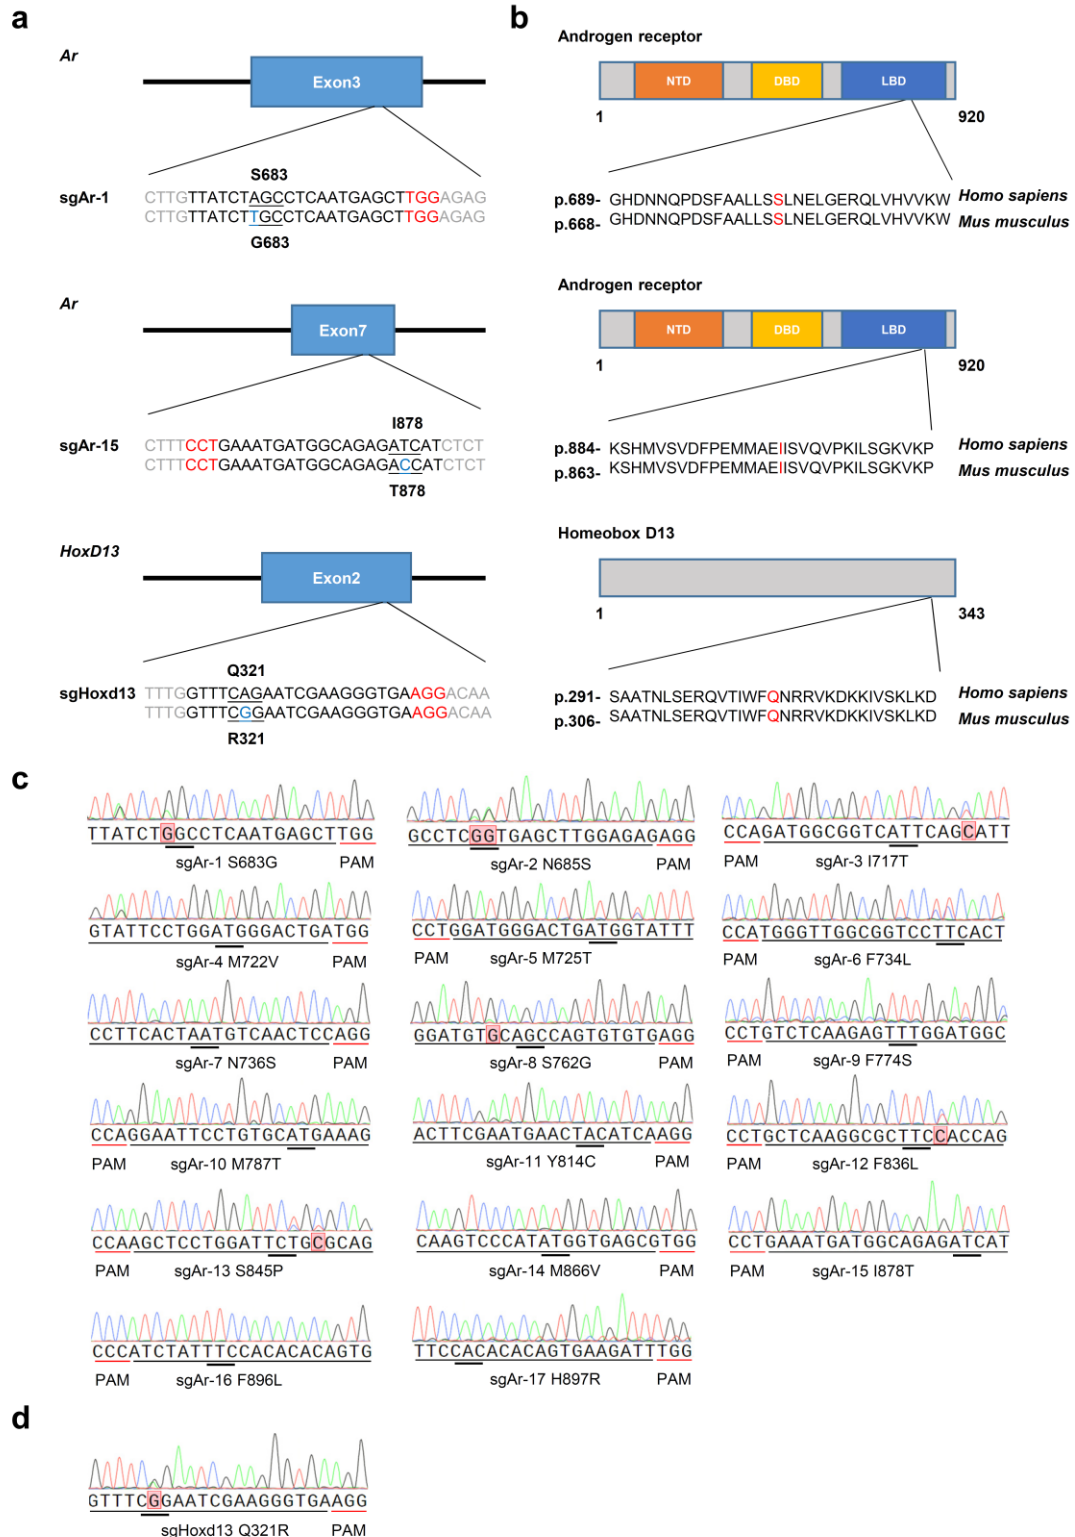

**Supplementary Figure 1. The targeted sequences at the *Ar* and *Hoxd13* loci.**

(a) The PAM sequences and the sgRNA targeted sequences are shown in red and black and underlined, respectively; the substitutions in blue.

(b) Schematic illustration shows the localization of disease relevant mutation sites on Androgen receptor protein and Homeobox D13 protein of human. Lower parts of each illustration show the alignments of the conserved amino acid sequence from *H. sapiens* to *M. musculus*. The targeted

sites in this study were highlighted in red.

(c) Sanger sequencing chromatograms of ABE-mediated base editing of *Ar* in N2a cells. The PAM sequence and sgRNA sequence are underlined in red and black, respectively. The corresponding targeted codons are shown under the target sequence.

(d) Sanger sequencing chromatograms of ABE-mediated base editing of *Hoxd13* in N2a cells. The PAM sequence and sgRNA sequence are underlined in red and black, respectively. The corresponding targeted codons are shown under the target sequence.

**a**

| sgAr-1 |                         | Frequency(%) |       |
|--------|-------------------------|--------------|-------|
| WT     | TTATCTAGCCTCAATGAGCTTGG |              |       |
| #1     | TTGTCTGGCCTCAATGAGCTTGG | 8/15         | (53)  |
|        | TTGTCTAGCCTCAATGAGCTTGG | 4/15         | (27)  |
| #2     | TTGTCTGGCCTCAATGAGCTTGG | 2/11         | (18)  |
|        | TTGTCTAGCCTCAATGAGCTTGG | 1/11         | (9)   |
| #3     | TTGTCTGGCCTCAATGAGCTTGG | 4/13         | (31)  |
|        | TTGTCTAGCCTCAATGAGCTTGG | 5/13         | (38)  |
| #4     | TTGTCTGGCCTCAATGAGCTTGG | 12/13        | (92)  |
|        | TTATCTGGCCTCAATGAGCTTGG | 1/13         | (8)   |
| #5     | TTGTCTGGCCTCAATGAGCTTGG | 7/11         | (64)  |
|        | TTATCTGGCCTCAATGAGCTTGG | 4/11         | (36)  |
| #6     | TTATCTGGCCTCAATGAGCTTGG | 4/12         | (33)  |
|        | TTGTCTGGCCTCAATGAGCTTGG | 5/12         | (42)  |
|        | TTGTCTAGCCTCAATGAGCTTGG | 1/12         | (8)   |
| #7     | TTGTGTGGCCTCAATGAGCTTGG | 2/15         | (13)  |
|        | TTGTCTGGCCTCAATGAGCTTGG | 12/15        | (80)  |
|        | TTATCTGGCCTCAATGAGCTTGG | 1/15         | (7)   |
| #8     | TTGTCTGGCCTCAATGAGCTTGG | 4/10         | (40)  |
|        | TTGTCTAGCCTCAATGAGCTTGG | 3/10         | (30)  |
| #9     | TTGTCTGGCCTCAATGAGCTTGG | 11/11        | (100) |
| #10    | TTATCTGGCCTCAATGAGCTTGG | 4/17         | (24)  |
|        | TTGTCTGGCCTCAATGAGCTTGG | 10/17        | (59)  |
|        | TTGTCTAGCCTCAATGAGCTTGG | 2/17         | (12)  |
| #11    | TTATCTGGCCTCAATGAGCTTGG | 11/11        | (100) |
| #12    | TTGTCTGGCCTCAATGAGCTTGG | 2/12         | (17)  |
|        | TTATCTGGCCTCAATGAGCTTGG | 3/12         | (25)  |
|        | TTGTCTAGCCTCAATGAGCTTGG | 4/12         | (33)  |
|        | TTATATGGCCTCAATGAGCTTGG | 1/12         | (8)   |
| #13    | TTGTCTGGCCTCAATGAGCTTGG | 9/16         | (56)  |
|        | TTATCTGGCCTCAATGAGCTTGG | 3/16         | (19)  |
|        | TTGTCTAGCCTCAATGAGCTTGG | 3/16         | (19)  |
| #14    | TTGTCTGGCCTCAATGAGCTTGG | 10/11        | (91)  |
| #15    | TTGTCTGGCCTCAATGAGCTTGG | 10/13        | (77)  |
|        | TTATCTGGCCTCAATGAGCTTGG | 1/13         | (8)   |
|        | TTGTCTAGCCTCAATGAGCTTGG | 1/13         | (8)   |
| #16    | TTGTCTGGCCTCAATGAGCTTGG | 6/10         | (60)  |
|        | TTATCTGGCCTCAATGAGCTTGG | 2/10         | (20)  |
|        | TTATCTGGCCCAATGAGCTTGG  | 1/10         | (10)  |

**b**

| sgAr-15 |                          | Frequency(%) |      |
|---------|--------------------------|--------------|------|
| WT      | CCTGAAATGATGGCAGAGATCCAT |              |      |
| #1      | CCTGAAATGATGGCAGAGACCAT  | 5/13         | (38) |
| #2      | CCTGAAATGATGGCAGAGACCAT  | 1/12         | (8)  |
| #3      | CCTGAAATGATGGCAGAGACCAT  | 7/15         | (47) |
| #4      | CCTGAAATGATGGCAGAGACCAT  | 7/14         | (50) |
| #5      | CCTGAAATGATGGCAGAGACCAT  | 4/10         | (40) |
| #6      | CCTGAAATGATGGCAGAGACCAT  | 2/10         | (20) |
| #7      | CCTGAAATGATGGCAGAGACCAT  | 6/14         | (43) |
| #8      | CCTGAAATGATGGCAGAGACCAT  | 7/13         | (54) |
| #9      | CCTGAAATGATGGCAGAGACCAT  | 4/10         | (40) |
| #10     | CCTGAAATGATGGCAGAGACCAT  | 5/13         | (38) |
| #11     | CCTGAAATGATGGCAGAGACCAT  | 6/12         | (50) |
| #12     | CCTGAAATGATGGCAGAGACCAT  | 7/14         | (50) |
| #13     | CCTGAAATGATGGCAGAGACCAT  | 10/14        | (71) |
| #14     | CCTGAAATGATGGCAGAGACCAT  | 5/12         | (42) |
| #15     | CCTGAAATGATGGCAGAGACCAT  | 3/12         | (25) |
| #16     | CCTGAAATGATGGCAGAGACCAT  | 6/11         | (55) |

**c**

| sgHoxd13 |                         | Frequency(%) |       |
|----------|-------------------------|--------------|-------|
| WT       | GTTTCAGAATCGAAGGGTGAAGG |              |       |
| #1       | GTTTCGGAATCGAAGGGTGAAGG | 8/13         | (62)  |
|          | GTTTCAGGATCGAAGGGTGAAGG | 4/13         | (31)  |
| #2       | GTTTCGGAATCGAAGGGTGAAGG | 7/10         | (70)  |
|          | GTTTCGGATCGAAGGGTGAAGG  | 3/10         | (30)  |
| #3       | GTTTCGGAATCGAAGGGTGAAGG | 10/15        | (67)  |
| #4       | GTTTCGGAATCGAAGGGTGAAGG | 4/12         | (33)  |
| #5       | GTTTCGGAATCGAAGGGTGAAGG | 2/11         | (18)  |
|          | GTTTCAGGATCGAAGGGTGAAGG | 5/11         | (45)  |
| #6       | GTTTCGGAATCGAAGGGTGAAGG | 4/12         | (33)  |
|          | GTTTCAGGATCGAAGGGTGAAGG | 1/12         | (8)   |
| #7       | GTTTCGGAATCGAAGGGTGAAGG | 9/10         | (90)  |
| #8       | GTTTCGGAATCGAAGGGTGAAGG | 9/12         | (75)  |
| #9       | GTTTCGGAATCGAAGGGTGAAGG | 5/12         | (42)  |
|          | GTTTCGGAGTCGAAGGGTGAAGG | 2/12         | (17)  |
|          | GTTTCAGGATCGAAGGGTGAAGG | 2/12         | (17)  |
| #10      | GTTTCGGAATCGAAGGGTGAAGG | 6/10         | (60)  |
| #11      | GTTTCGGAATCGAAGGGTGAAGG | 9/10         | (90)  |
| #12      | GTTTCGGAATCGAAGGGTGAAGG | 9/10         | (90)  |
| #13      | GTTTCGGAATCGAAGGGTGAAGG | 10/10        | (100) |
| #14      | GTTTCGGAATCGAAGGGTGAAGG | 6/11         | (55)  |
|          | GTTTCAGGATCGAAGGGTGAAGG | 5/11         | (45)  |

**d**

|          |            |   |                |            |            |                |                |                |                |     |            |                |     |            |   |                                                          |
|----------|------------|---|----------------|------------|------------|----------------|----------------|----------------|----------------|-----|------------|----------------|-----|------------|---|----------------------------------------------------------|
| sgAr-1   | T          | T | A <sub>3</sub> | T          | C          | T              | A <sub>7</sub> | G              | C              | C   | T          | C              | A   | A          | T | <b>WT</b><br>#1, 2, 4-6, 8-11, 13-15<br>#12<br>#7<br>#16 |
|          | <b>Leu</b> |   |                | <b>Ser</b> |            |                | <b>Ser</b>     |                |                |     | <b>Leu</b> |                |     | <b>Asn</b> |   |                                                          |
|          | Leu        |   |                | Ser        |            |                | Gly            |                |                |     | Leu        |                |     | Asn        |   |                                                          |
|          | Leu        |   |                | Tyr        |            |                | Gly            |                |                |     | Leu        |                |     | Asn        |   |                                                          |
|          | Leu        |   |                | Cys        |            |                | Gly            |                |                |     | Leu        |                |     | Asn        |   |                                                          |
| Leu      |            |   | Ser            |            |            | Gly            |                |                |                | Pro |            |                | Asn |            |   |                                                          |
| sgAr-15  | G          | A | T              | G          | G          | C              | A              | G              | A              | G   | A          | T <sub>4</sub> | C   | A          | T | <b>WT</b><br>#1-16                                       |
|          | <b>Met</b> |   |                |            | <b>Ala</b> |                |                | <b>Glu</b>     |                |     | <b>Ile</b> |                |     | <b>Ile</b> |   |                                                          |
|          | Met        |   |                |            | Ala        |                |                | Glu            |                |     | Thr        |                |     | Ile        |   |                                                          |
| sgHoxd13 | G          | T | T              | T          | C          | A <sub>6</sub> | G              | A <sub>8</sub> | A <sub>9</sub> | T   | C          | G              | A   | A          | G | <b>WT</b><br>#1-16<br>#1, 2, 5, 6, 14<br>#9              |
|          | <b>Phe</b> |   |                |            | <b>Gln</b> |                |                | <b>Asn</b>     |                |     | <b>Arg</b> |                |     | <b>Arg</b> |   |                                                          |
|          | Phe        |   |                |            | Arg        |                |                | Asn            |                |     | Arg        |                |     | Arg        |   |                                                          |
|          | Phe        |   |                |            | Arg        |                |                | Asp            |                |     | Arg        |                |     | Arg        |   |                                                          |
| Phe      |            |   |                | Arg        |            |                | Asp/Ser        |                |                | Arg |            |                | Arg |            |   |                                                          |

**e**

| Target gene   | Methods           | No. of examined embryos | No. of blastocysts (%) | Mutant ratio (%)                   |                              |         |
|---------------|-------------------|-------------------------|------------------------|------------------------------------|------------------------------|---------|
|               |                   |                         |                        | No. of mutants /tested blastocysts | No. of indels/ total mutants |         |
| <i>Ar</i>     | sgAr-1+ABE mRNA   | Microinjection          | 18                     | 17 (94) <sup>a</sup>               | 16/16 (100)                  | 0/16(0) |
| <i>Ar</i>     | sgAr-15+ABE mRNA  | Microinjection          | 22                     | 20 (91) <sup>a</sup>               | 16/16 (100)                  | 0/16(0) |
| <i>Hoxd13</i> | sgHoxd13+ABE mRNA | Microinjection          | 14                     | 13 (93) <sup>a</sup>               | 14/14 (100)                  | 0/14(0) |

<sup>a</sup>Calculated from the number of examined embryos.

**Supplementary Figure 2. The sequencing analysis of the embryos by ABE-mediated base editing.**

(a-c) Alignments of modified sequences from embryos after microinjection of ABE mRNA and sgRNAs into one-cell embryos. The PAM sequence and substitutions are highlighted in blue and red, respectively; N/N indicates positive colonies out of total sequenced. The corresponding targeted codons are shown. (a) The sequencing results for sgAr-1; (b) The sequencing results for sgAr-15; (c) The sequencing results for sgHoxd13.

(d) Alignments of modified amino acid sequences and their corresponding number of the samples.

(e) Summary of the manipulation and genotyping of mouse embryos.

**a**

| sgAr-1 |                         | Frequency(%) |
|--------|-------------------------|--------------|
| WT     | TTATCTAGCCTCAATGAGCTTGG |              |
| A001   | TTGTCTGGCCTCAATGAGCTTGG | 10/11 (91)   |
|        | TTGTCTAGCCTCAATGAGCTTGG | 1/11 (9)     |
| A002   | TTGTCTGGCCTCAATGAGCTTGG | 2/11 (18)    |
| A003   | TTGTCTAGCCTCAATGAGCTTGG | 10/10 (100)  |
| A004   | TTGTCTGGCCTCAATGAGCTTGG | 10/11 (91)   |
|        | TTATCTGGCCTCAATGAGCTTGG | 1/11 (9)     |
| A005   | TTATCTGGCCTCAATGAGCTTGG | 3/12 (25)    |
|        | TTGTCTAGCCTCAATGAGCTTGG | 3/12 (25)    |
| A006   | TTATCTGGCCTCAATGAGCTTGG | 5/13 (38)    |
|        | TTGTCTGGCCTCAATGAGCTTGG | 4/13 (31)    |
|        | TTGTCTAGCCTCAATGAGCTTGG | 3/13 (23)    |
| A007   | TTATCTGGCCTCAATGAGCTTGG | 6/11 (55)    |
|        | TTGTCTGGCCTCAATGAGCTTGG | 1/11 (9)     |
| A008   | TTATCTGGCCTCAATGAGCTTGG | 8/12 (67)    |
|        | TTGTCTGGCCTCAATGAGCTTGG | 1/12 (8)     |
|        | TTGTCTAGCCTCAATGAGCTTGG | 3/12 (25)    |
| A009   | TTGTCTAGCCTCAATGAGCTTGG | 11/12 (92)   |
|        | TTGTCTGGCCTCAATGAGCTTGG | 1/12 (8)     |
| A010   | TTGTCTGGCCTCAATGAGCTTGG | 5/12 (42)    |
| A011   | TTGTCTGGCCTCAATGAGCTTGG | 1/10 (90)    |
|        | TTGTCTAGCCTCAATGAGCTTGG | 9/10 (90)    |
| A012   | TTGTCTGGCCTCAATGAGCTTGG | 11/15 (73)   |
| A013   | TTGTCTGGCCTCAATGAGCTTGG | 11/12 (92)   |
| A014   | TTGTCTGGCCTCAATGAGCTTGG | 13/13 (100)  |
| A015   | TTGTCTGGCCTCAATGAGCTTGG | 11/11 (100)  |
| A016   | TTGTCTGGCCTCAATGAGCTTGG | 11/12 (92)   |
|        | TTGTCTAGCCTCAATGAGCTTGG | 1/12 (8)     |
| A017   | TTGTCTGGCCTCAATGAGCTTGG | 5/10 (50)    |
|        | TTATCTGGCCTCAATGAGCTTGG | 2/10 (20)    |
| A018   | TTATCTGGCCTCAATGAGCTTGG | 3/10 (30)    |
|        | TTGTCTAGCCTCAATGAGCTTGG | 5/10 (50)    |
| A019   | TTGTCTGGCCTCAATGAGCTTGG | 3/11 (27)    |
|        | TTATCTGGCCTCAATGAGCTTGG | 7/11 (64)    |
| A020   | TTGTCTGGCCTCAATGAGCTTGG | 3/13 (23)    |
|        | TTGTCTGGCCTCAATGAGCTTGG | 1/13 (8)     |
| A021   | TTGTCTGGCCTCAATGAGCTTGG | 11/11 (100)  |
| A022   | TTGTCTGGCCTCAATGAGCTTGG | 8/13 (62)    |
|        | TTATCTGGCCTCAATGAGCTTGG | 4/13 (30)    |
|        | TTGTCTAGCCTCAATGAGCTTGG | 1/13 (8)     |

**b**

| sgAr-15 |                         | Frequency(%) |
|---------|-------------------------|--------------|
| WT      | CCTGAAATGATGGCAGAGATCAT |              |
| A046    | CCTGAAATGATGGCAGAGACCAT | 9/12 (75)    |
| A047    | CCTGAAATGATGGCAGAGACCAT | 11/12 (92)   |
| A048    | CCTGAAATGATGGCAGAGACCAT | 6/10 (60)    |
| A049    | CCTGAAATGATGGCAGAGATCAT | 11/11 (100)  |
| A050    | CCTGAAATGATGGCAGAGACCAT | 6/12 (50)    |
| A051    | CCTGAAATGATGGCAGAGACCAT | 4/10 (40)    |
| A052    | CCTGAAATGATGGCAGAGACCAT | 10/10 (100)  |
| A053    | CCTGAAATGATGGCAGAGACCAT | 5/12 (42)    |
| A054    | CCTGAAATGATGGCAGAGACCAT | 12/12 (100)  |
| A055    | CCTGAAATGATGGCAGAGACCAT | 5/10 (50)    |
| A056    | CCTGAAATGATGGCAGAGACCAT | 3/11 (27)    |
| A057    | CCTGAAATGATGGCAGAGACCAT | 5/11 (45)    |
| A058    | CCTGAAATGATGGCAGAGACCAT | 3/12 (25)    |
| A059    | CCTGAAATGATGGCAGAGACCAT | 3/11 (27)    |
| A060    | CCTGAAATGATGGCAGAGACCAT | 4/11 (36)    |
| A061    | CCTGAAATGATGGCAGAGACCAT | 4/13 (31)    |
| A062    | CCTGAAATGATGGCAGAGACCAT | 6/11 (55)    |
| A063    | CCTGAAATGATGGCAGAGACCAT | 12/12 (100)  |
| A064    | CCTGAAATGATGGCAGAGACCAT | 3/12 (25)    |

**C**

| sgHoxd13 |                         | Frequency(%) | sgHoxd13 |                         | Frequency(%) |
|----------|-------------------------|--------------|----------|-------------------------|--------------|
| WT       | GTTTCAGAATCGAAGGGTGAAGG |              | WT       | GTTTCAGAATCGAAGGGTGAAGG |              |
| H001     | GTTTCGGAATCGAAGGGTGAAGG | 8/20 (40)    | H016     | GTTTCAGAATCGAAGGGTGAAGG | 10/10 (100)  |
|          | GTTTCAGGGTCGAAGGGTGAAGG | 5/20 (25)    | H017     | GTTTCGGAATCGAAGGGTGAAGG | 8/11 (73)    |
| H002     | GTTTCAGAATCGAAGGGTGAAGG | 13/13 (100)  | H018     | GTTTCGGAATCGAAGGGTGAAGG | 9/13 (69)    |
| H003     | GTTTCGGAATCGAAGGGTGAAGG | 2/13 (15)    |          | GTTTCGGGATCGAAGGGTGAAGG | 4/13 (31)    |
|          | GTTTCAGGATCGAAGGGTGAAGG | 8/13 (62)    | H019     | GTTTCAGAATCGAAGGGTGAAGG | 13/13 (100)  |
| H004     | GTTTCAGAATCGAAGGGTGAAGG | 10/10 (100)  | H020     | GTTTCGGAATCGAAGGGTGAAGG | 9/10 (90)    |
| H005     | GTTTCAGAATCGAAGGGTGAAGG | 12/12 (100)  | H021     | GTTTCGGAATCGAAGGGTGAAGG | 9/12 (75)    |
| H006     | GTTTCGGAATCGAAGGGTGAAGG | 3/11 (27)    | H022     | GTTTCGGAATCGAAGGGTGAAGG | 12/12 (100)  |
| H007     | GTTTCGGAATCGAAGGGTGAAGG | 4/10 (40)    | H023     | GTTTCGGAATCGAAGGGTGAAGG | 4/10 (40)    |
| H008     | GTTTCGGAATCGAAGGGTGAAGG | 6/10 (60)    |          | GTTTCGGGATCGAAGGGTGAAGG | 5/10 (50)    |
| H009     | GTTTCGGAATCGAAGGGTGAAGG | 6/15 (40)    | H024     | GTTTCGGAATCGAAGGGTGAAGG | 4/10 (40)    |
| H010     | GTTTCGGAATCGAAGGGTGAAGG | 3/11 (27)    |          | GTTTCAGGATCGAAGGGTGAAGG | 5/10 (50)    |
| H011     | GTTTCGGAATCGAAGGGTGAAGG | 2/20 (10)    | H025     | GTTTCGGAATCGAAGGGTGAAGG | 8/10 (80)    |
|          | GTTTCAGGATCGAAGGGTGAAGG | 8/20 (40)    | H026     | GTTTCGGAATCGAAGGGTGAAGG | 7/13 (54)    |
| H012     | GTTTCGGAATCGAAGGGTGAAGG | 9/10 (90)    | H027     | GTTTCGGAATCGAAGGGTGAAGG | 2/11 (18)    |
| H013     | GTTTCGGAATCGAAGGGTGAAGG | 1/12 (8)     | H028     | GTTTCAGAATCGAAGGGTGAAGG | 11/11 (100)  |
|          | GTTTCGGGATCGAAGGGTGAAGG | 2/12 (17)    | H029     | GTTTCGGAATCGAAGGGTGAAGG | 12/12 (100)  |
| H014     | GTTTCGGAATCGAAGGGTGAAGG | 5/11 (45)    | H030     | GTTTCGGAATCGAAGGGTGAAGG | 4/11 (36)    |
| H015     | GTTTCGGAATCGAAGGGTGAAGG | 8/10 (80)    |          | GTTTCAGGATCGAAGGGTGAAGG | 2/11 (18)    |
|          | GTTTCAGGATCGAAGGGTGAAGG | 1/10 (10)    | H031     | GTTTCGGAATCGAAGGGTGAAGG | 4/18 (22)    |
|          |                         |              |          | GTTTCGGGATCGAAGGGTGAAGG | 5/18 (27)    |
|          |                         |              | H032     | GTTTCGGAATCGAAGGGTGAAGG | 6/12 (50)    |
|          |                         |              |          | GTTTCGGGATCGAAGGGTGAAGG | 6/12 (50)    |

**d**

|          |                                                                      |                                          |
|----------|----------------------------------------------------------------------|------------------------------------------|
| sgAr-1   | T T A <sub>3</sub> T C T A <sub>7</sub> G C C T C A A T              | WT                                       |
|          | Leu Ser Ser Leu Asn                                                  | A001-019, 021, 022                       |
|          | Leu Ser Gly Leu Asn                                                  | A020                                     |
|          | Leu Phe Gly Leu Asn                                                  |                                          |
| sgAr-15  | G A T G G C A G A G A T <sub>4</sub> C A T                           | WT                                       |
|          | Met Ala Glu Ile Ile                                                  | A046-064                                 |
|          | Met Ala Glu Thr Ile                                                  |                                          |
|          |                                                                      |                                          |
| sgHoxd13 | G T T T C A <sub>6</sub> G A <sub>8</sub> A <sub>9</sub> T C G A A G | WT                                       |
|          | Phe Gln Asn Arg Arg                                                  | H001                                     |
|          | Phe Arg Gly Arg Arg                                                  | H003, 013, 015, 018, 023-024, 030-032    |
|          | Phe Arg Asp Arg Arg                                                  | H006-012, 014, 017, 020-022, 025-027, 29 |
|          | Phe Arg Asn Arg Arg                                                  |                                          |

**Supplementary Figure 3. The sequencing analysis of the newborn pups targeting at *Ar* and *Hoxd13*, respectively.**

(a-c) Alignments of modified sequences from newborn pups after microinjection of ABE mRNA and sgRNAs targeting at *Ar* and *Hoxd13* respectively into one-cell embryos. The PAM sequences and substitutions are highlighted in blue and red, respectively; N/N indicates positive colonies out of total sequenced. The corresponding targeted codons are shown. (a) The sequencing results for sgAr-1; (b) The sequencing results for sgAr-15; (c) The sequencing results for sgHoxd13.

(d) Alignments of modified amino acid sequences and their corresponding number of the tested pups.



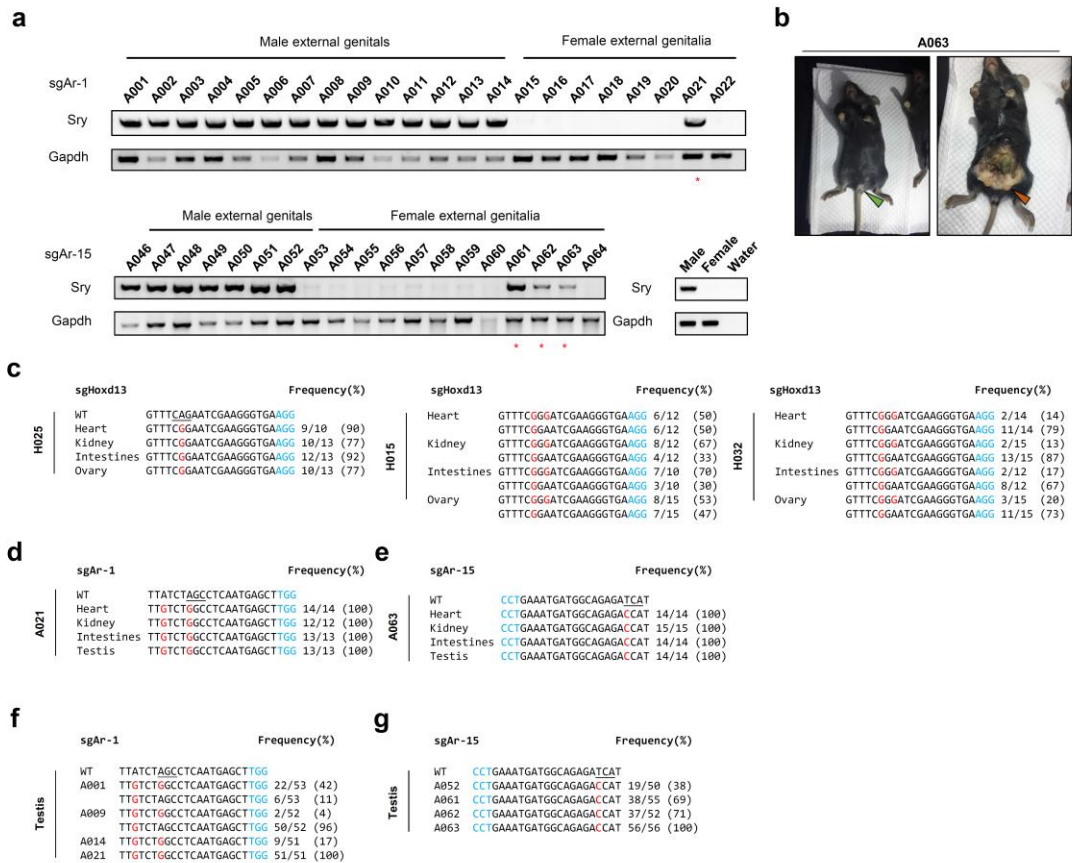

### Supplementary Figure 4. Phenotype and genotype analysis of founder mice.

(a) PCR-based genotype analysis of gender. The red stars indicate the feminized mice carrying Y chromosome-specific gene, Sry, suggesting sex reversal.

(b) Sexual reverse phenotypes in founder mouse. Left: five-week-old mouse with female genitalia (green arrowhead); Right: A063 mouse with internal genitalia of male (orange arrowhead).

(c) Alignments of modified sequences from different tissues of three mice targeting Hoxd13. The PAM sequences and substitutions are highlighted in blue and red, respectively; N/N indicates positive colonies out of total sequenced. The corresponding targeted codons are shown.

(d-e) Alignments of modified sequences from different tissues of two mice targeting Ar. The PAM sequences and substitutions are highlighted in blue and red, respectively; N/N indicates positive colonies out of total sequenced. The corresponding targeted codons are shown. (d) the sequencing results for Founder A021; (e) the sequencing results for Founder A063.

(f-g) Alignments of modified sequences from testis of mice harboring 100% base substitution or displaying phenotypes. The PAM sequences and substitutions are highlighted in blue and red, respectively; N/N indicates positive colonies out of total sequenced. The corresponding targeted codons are shown. (f) the sequencing results from A001, A009, A014 and A021 for sgAr-1; (g) the sequencing results from A052, A061, A062 and A063 for sgAr-15.



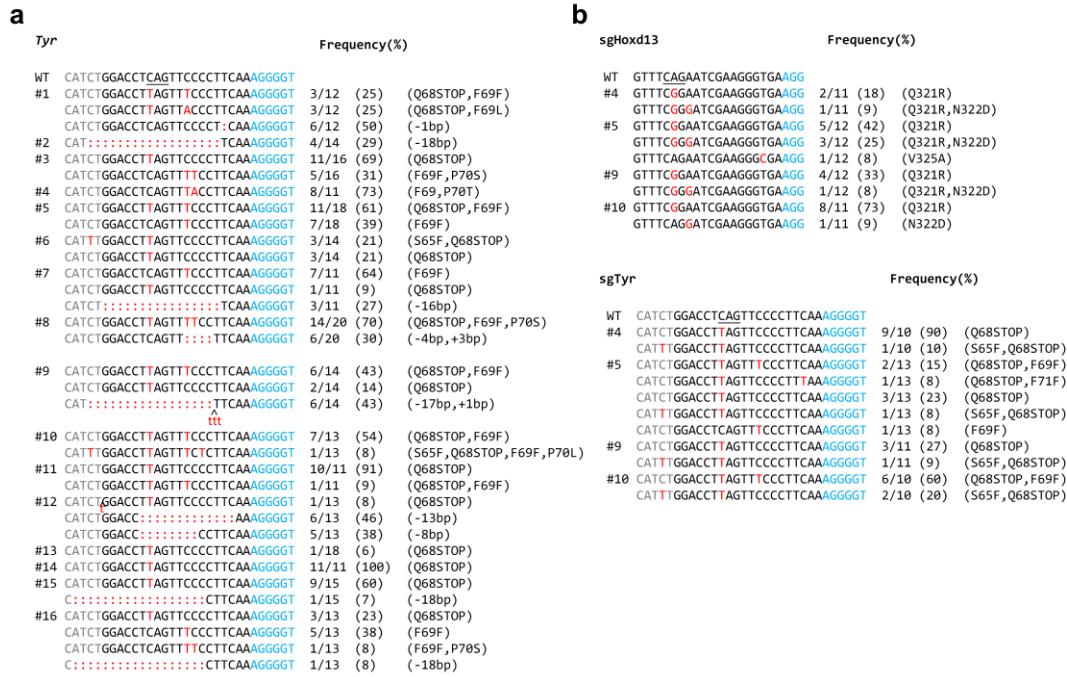

| Target gene       | Methods        | No. of examined embryos | No. of blastocysts (%) | Mutant ratio (%) No. of mutants /total embryos |                        |                       |                       |                        |                        |                                                  |
|-------------------|----------------|-------------------------|------------------------|------------------------------------------------|------------------------|-----------------------|-----------------------|------------------------|------------------------|--------------------------------------------------|
|                   |                |                         |                        | <i>Hoxd13</i>                                  |                        |                       | <i>Tyr</i>            |                        |                        | <i>Hoxd13</i> (A6, Q321R) & <i>Tyr</i> (Q68stop) |
|                   |                |                         |                        | A6, Q321R                                      | A6, N322D              | Others                | Q68stop               | indel                  | Others                 |                                                  |
| <i>Hoxd13/Tyr</i> | Microinjection | 15                      | 15(100) <sup>a</sup>   | 13/15 (87) <sup>a</sup>                        | 5/15 (33) <sup>a</sup> | 0/15 (0) <sup>a</sup> | 1/15 (7) <sup>a</sup> | 6/15 (40) <sup>a</sup> | 7/15 (47) <sup>a</sup> | 1/15 (7) <sup>a</sup>                            |

<sup>a</sup>Calculated from the number of examined embryos.

### Supplementary Figure 5. The sequencing analysis of the embryos by BE-mediated base editing targeting at *Tyr* and *Tyr/Hoxd13*.

(a) Alignments of modified sequences from embryos after microinjection of SaBE3 mRNA and sgRNAs targeting at *Tyr* into one-cell embryos. The PAM sequences and substitutions are highlighted in blue and red, respectively; N/N indicates positive colonies out of total sequenced. The corresponding targeted codons are shown.

(b) Representative alignments of modified sequences from embryos after microinjection of ABE/saBE3 mRNA and sgRNAs targeting *Hoxd13* and *Tyr*, respectively. The PAM sequences and substitutions are highlighted in blue and red, respectively; N/N indicates positive colonies out of total sequenced. The corresponding targeted codons are shown.

(c) Summary of the manipulation and genotyping of mouse embryos for SaBE3 and ABE targeting *Hoxd13* and *Tyr* simultaneously.

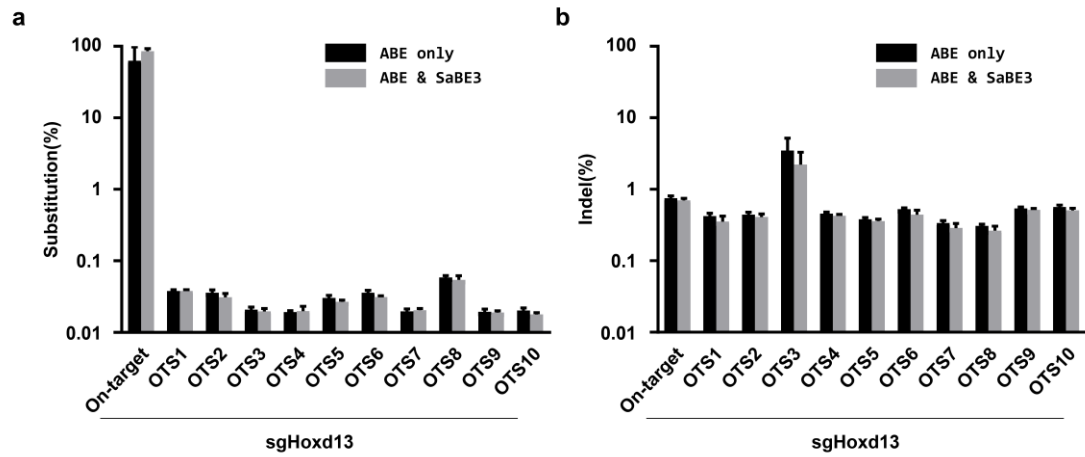

**Supplementary Figure 6. Orthogonality analysis for BE and ABE double editing.**

(a-b) Targeted deep sequencing was used to measure efficiencies of A-to-G substitution and indel at on-/off-target sites in mutant mice (n=5) and wild type mice (n=5). (a) substitution frequencies and (b) indel frequencies are shown via black and grey columns for ABE only groups and ABE & SaBE3 groups, respectively.

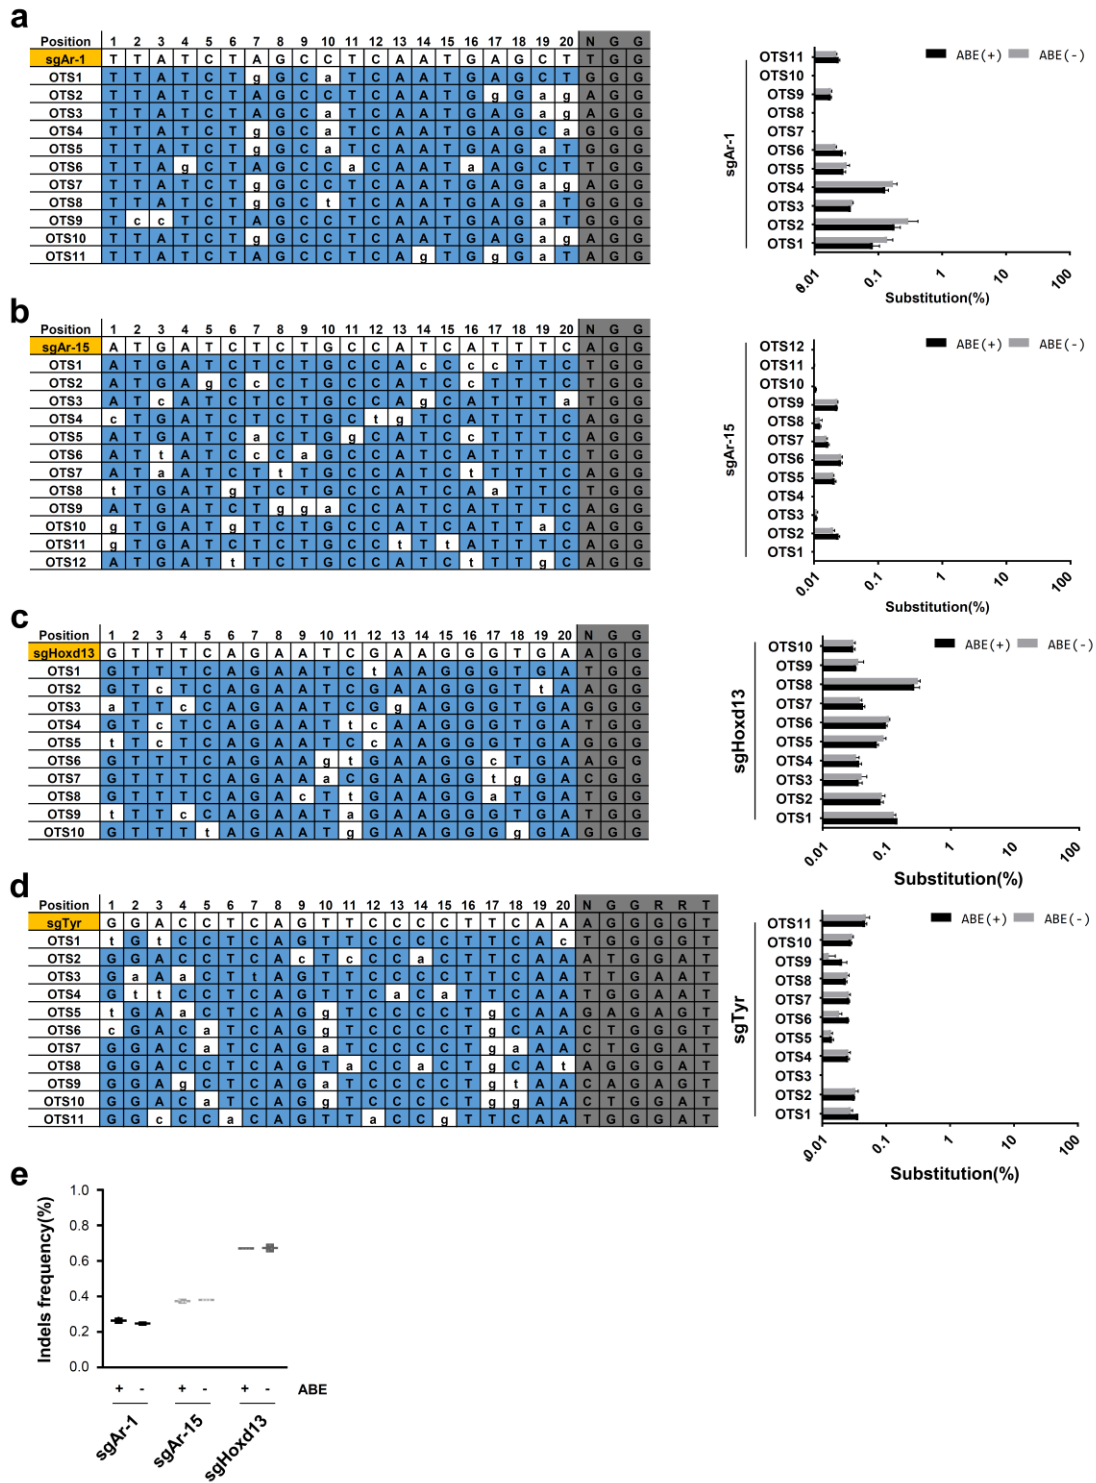

**Supplementary Figure 7. The high throughput analysis of off-target and indels by deep sequencing.**

(a-d) Targeted deep sequencing was used to measure base editing efficiencies at potential off-target sites in mutant mice (n=3). Left: Mismatched nucleotides and PAM sequences are shown in white and grey boxes, respectively; Right: Substitution frequencies are shown via black and grey columns for ABE(+) groups and ABE(-) groups, respectively. (a) the off-target analysis for sgAr-1; (b) the off-target analysis for sgAr-15; (c) the off-target analysis for sgHoxd13; (d) the off-target analysis

for sgTyr.

(e) Targeted deep sequencing was used to measure indel efficiencies at on-target sites in mutant mice (n=3). +/- indicate ABE groups and control groups.

**a**

| sgHoxd13 |                          | Frequency(%)       |
|----------|--------------------------|--------------------|
| WT       | GTTTCAGAAATCGAAGGGTGAAGG |                    |
| H101, ♂  | GTTTCGGAATCGAAGGGTGAAGG  | 7/16 (44) (Q321R)  |
| H102, ♀  | GTTTCGGAATCGAAGGGTGAAGG  | 6/13 (46) (Q321R)  |
| H103, ♂  | GTTTCGGAATCGAAGGGTGAAGG  | 6/12 (50) (Q321R)  |
| H104, ♂  | GTTTCGGAATCGAAGGGTGAAGG  | 5/12 (42) (Q321R)  |
| H105, ♀  | GTTTCGGAATCGAAGGGTGAAGG  | 9/16 (56) (Q321R)  |
| H106, ♂  | GTTTCGGAATCGAAGGGTGAAGG  | 8/14 (57) (Q321R)  |
| H107, ♂  | GTTTCGGAATCGAAGGGTGAAGG  | 9/16 (56) (Q321R)  |
| H108, ♀  | GTTTCGGAATCGAAGGGTGAAGG  | 11/23 (48) (Q321R) |

**Supplementary Figure 8. Germline transmission of the mutant Hoxd13 mouse.**

(a) Alignments of modified sequences from F1 newborn pups. The PAM sequences and substitutions are highlighted in blue and red, respectively; N/N indicates positive colonies out of total sequenced. The corresponding targeted codons are shown.

**Supplementary Table 1. sgRNAs used in this study**

| <b>sgRNA name</b>   | <b>sgRNA sequence</b> |
|---------------------|-----------------------|
| <b>GFP-Scramble</b> | GACTGGCATCATCTCGCACG  |
| <b>GFP-sg</b>       | CGTACGTCAGGGTGGTCACGA |
| <b>Ar-1</b>         | TTATCTAGCCTCAATGAGCT  |
| <b>Ar-2</b>         | GCCTCAATGAGCTTGGAGAG  |
| <b>Ar-3</b>         | AATACTGAATGACCGCCATC  |
| <b>Ar-4</b>         | GTATTCCCTGGATGGGACTGA |
| <b>Ar-5</b>         | AAATACCATCAGTCCCATCC  |
| <b>Ar-6</b>         | AGTGAAGGACCGCCAACCCA  |
| <b>Ar-7</b>         | CCTTCACTAATGTCAACTCC  |
| <b>Ar-8</b>         | GGATGTACAGCCAGTGTGTG  |
| <b>Ar-9</b>         | GCCATCCAAACTCTTGAGAC  |
| <b>Ar-10</b>        | CTTTCATGCACAGGAATTCC  |
| <b>Ar-11</b>        | ACTTCGAATGAACTACATCA  |
| <b>Ar-12</b>        | CTGGTAGAAGCGCCTTGAGC  |
| <b>Ar-13</b>        | CTGCACAGAATCCAGGAGCT  |
| <b>Ar-14</b>        | CAAGTCCCATATGGTGAGCG  |
| <b>Ar-15</b>        | ATGATCTCTGCCATCATTTC  |
| <b>Ar-16</b>        | CACTGTGTGTGGAAATAGAT  |
| <b>Ar-17</b>        | TTCCACACACAGTGAAGATT  |
| <b>Hoxd13</b>       | GTTTCAGAATCGAAGGGTGA  |
| <b>Tyr</b>          | GGACCTCAGTTCCCCTTCAA  |

**Supplementary Table 2. Primers used for PCR amplification, genotyping and transcription**

| <b>Primers name</b> | <b>Primer sequence</b>    |
|---------------------|---------------------------|
| GFP-fwd             | TTCCATTTTCAGGTGTCGTGG     |
| GFP-rev             | CAGAGAGAAGTTTGTTCGCGCC    |
| Ar-sg1-T7-fwd       | GCTCGTAAGCTGAAGAACTTGG    |
| Ar-sg1-T7-rev       | ACTGTGTGTATCAGTGGATTCAT   |
| Ar-sg2-T7-fwd       | GCTCGTAAGCTGAAGAACTTGG    |
| Ar-sg2-T7-rev       | ACTGTGTGTATCAGTGGATTCAT   |
| Ar-sg3-T7-fwd       | CAGCCCCACCATTCAGACTT      |
| Ar-sg3-T7-rev       | TGTTAGGGCCAATGTCAATTTCA   |
| Ar-sg4-T7-fwd       | CAGCCCCACCATTCAGACTT      |
| Ar-sg4-T7-rev       | TGTTAGGGCCAATGTCAATTTCA   |
| Ar-sg5-T7-fwd       | CAGCCCCACCATTCAGACTT      |
| Ar-sg5-T7-rev       | TGTTAGGGCCAATGTCAATTTCA   |
| Ar-sg6-T7-fwd       | CAGCCCCACCATTCAGACTT      |
| Ar-sg6-T7-rev       | TGTTAGGGCCAATGTCAATTTCA   |
| Ar-sg7-T7-fwd       | CAGCCCCACCATTCAGACTT      |
| Ar-sg7-T7-rev       | TGTTAGGGCCAATGTCAATTTCA   |
| Ar-sg8-T7-fwd       | TTTGGGCACAGGGGGA ACTA     |
| Ar-sg8-T7-rev       | ATGGAGAACTGGTAGAGGCTG     |
| Ar-sg9-T7-fwd       | TTTGGGCACAGGGGGA ACTA     |
| Ar-sg9-T7-rev       | ATGGAGAACTGGTAGAGGCTG     |
| Ar-sg10-T7-fwd      | TTTGGGCACAGGGGGA ACTA     |
| Ar-sg10-T7-rev      | ATGGAGAACTGGTAGAGGCTG     |
| Ar-sg11-T7-fwd      | AATTCCCCAGACACACAGACTT    |
| Ar-sg11-T7-rev      | GACTGTGACCTGTGTTCT        |
| Ar-sg12-T7-fwd      | AATTCCCCAGACACACAGACTT    |
| Ar-sg12-T7-rev      | GACTGTGACCTGTGTTCT        |
| Ar-sg13-T7-fwd      | AATTCCCCAGACACACAGACTT    |
| Ar-sg13-T7-rev      | GACTGTGACCTGTGTTCT        |
| Ar-sg14-T7-fwd      | CGGGCAGGATCAAGGATAAAC     |
| Ar-sg14-T7-rev      | AGCCACAATACGCAGCAGAT      |
| Ar-sg15-T7-fwd      | CGGGCAGGATCAAGGATAAAC     |
| Ar-sg15-T7-rev      | AGCCACAATACGCAGCAGAT      |
| Ar-sg16-T7-fwd      | CGGGCAGGATCAAGGATAAAC     |
| Ar-sg16-T7-rev      | AGCCACAATACGCAGCAGAT      |
| Ar-sg17-T7-fwd      | CGGGCAGGATCAAGGATAAAC     |
| Ar-sg17-T7-rev      | AGCCACAATACGCAGCAGAT      |
| Hoxd13-sg-T7-fwd    | AGCTTAGGTGTTCCAAGTATCCAGG |
| Hoxd13-sg-T7-rev    | TTCACAATGCTTGCCTTTCTAGGC  |
| Tyr-sg-T7-fwd       | CCAGGGGTTGCTGGAAAAGA      |
| Tyr-sg-T7-rev       | CATAGGTGCCTGTGGGGATG      |
| Sry-fwd             | GCACATTTTGGTCAGTGGCT      |



|                   |                                  |
|-------------------|----------------------------------|
| <b>Sry-rev</b>    | GCTCTACTCCAGTCTTGCCT             |
| <b>Gapdh-fwd</b>  | TGAGTGGACCCTTCTTTGTAG            |
| <b>Gapdh-rev</b>  | CATACCAGGAAATGAGCTTGAC           |
| <b>IVT-fwd</b>    | TCTCGCGCGTTTCGGTGATGACGG         |
| <b>IVT-sp-rev</b> | AAAAAAAGCACCGACTCGGTGCCACTTTTTTC |
| <b>IVT-sa-rev</b> | AAAAAAATCTCGCCAACAAGTTG          |

**Supplementary Table 3. Primers used for target deep sequencing**

| <b>Primer name</b> | <b>Primer sequence</b>  |
|--------------------|-------------------------|
| deep-Tyr-on-F1     | GGGCCCCCAATCCAACTT      |
| deep-Tyr-on-R1     | CCATGGATGGGTGATGGGAG    |
| deep-Tyr-OST1-F1   | CCCTGCTTCTATGTGGGTGT    |
| deep-Tyr-OST1-R1   | TCCCAGGGACTAACTAAGCCA   |
| deep-Tyr-OST2-F1   | GGGGAGCAGAAAGGAATCCA    |
| deep-Tyr-OST2-R1   | TCAATCCCCTCCCTCATTCCA   |
| deep-Tyr-OST3-F1   | GGATTAAACCCAGGTCCGCA    |
| deep-Tyr-OST3-R1   | GAAGAATCATGTCCGCCCA     |
| deep-Tyr-OST4-F1   | TCCAAAACAAAACAAACTGTGA  |
| deep-Tyr-OST4-R1   | AACACCTTAGACAGCCGACAT   |
| deep-Tyr-OST5-F1   | GAGGCTCTGATTTGCCAGT     |
| deep-Tyr-OST5-R1   | TCTCACAGAGACCAGAGGTGT   |
| deep-Tyr-OST6-F1   | TTGCAGCAAAGCTAACCTGG    |
| deep-Tyr-OST6-R1   | TGTGCTTGCAGAAGATCCCAT   |
| deep-Tyr-OST7-F1   | CAAGAACCACGAACAAGCAG    |
| deep-Tyr-OST7-R1   | CAAGACCAGCACACAGGG      |
| deep-Tyr-OST8-F1   | CTTCATGCAGCCACTCCCAC    |
| deep-Tyr-OST8-R1   | TGCTCTCAAGACCTCTGAGGAAA |
| deep-Tyr-OST9-F1   | TGGGCTCCCGTCAAGGTAAT    |
| deep-Tyr-OST9-R1   | CGTTAAATCTCATGGGCGGC    |
| deep-Tyr-OST10-F1  | TGTGTGAGATCTGGAGAGGTG   |
| deep-Tyr-OST10-R1  | CCATTTGCCTGCATGTATGTCT  |
| deep-Tyr-OST11-F1  | GCAGCAAGGAGCTTGGTTTC    |
| deep-Tyr-OST11-R1  | GGAGGGCAAGCCTTGAGATT    |
| deep-Hox-on-F1     | TGCCACGAACCTTTCGGAG     |
| deep-Hox-on-R1     | AGGATTCACAATGCTTGCTT    |
| deep-Hox-OST1-F1   | TGAGTCTGCTCTTCTGGATGG   |
| deep-Hox-OST1-R1   | AAGGACGACTGAAAGTGACCA   |
| deep-Hox-OST2-F1   | GGTCTGGACACAACCTCATTCCA |
| deep-Hox-OST2-R1   | CACTTCCACTCTGTCCCTGTC   |
| deep-Hox-OST3-F1   | TCTAAACACGTCCCTCCCCTG   |
| deep-Hox-OST3-R1   | CCACTACTGGCCTTCCTGTTC   |
| deep-Hox-OST4-F1   | GCTTGTTGGGAGCACTTAGG    |
| deep-Hox-OST4-R1   | GGGAAGCTTTGCAGTCCTTTG   |
| deep-Hox-OST5-F1   | TCCGATGACAGTGCAAGGTT    |
| deep-Hox-OST5-R1   | ATCGTACGCAGTTTCTGGG     |
| deep-Hox-OST6-F1   | TATGGTGGTGTGTCTGGGTC    |
| deep-Hox-OST6-R1   | GATGAATCGGCATGTGTGTGC   |
| deep-Hox-OST7-F1   | TGTGGCAATCAGAGGCATCA    |
| deep-Hox-OST7-R1   | AGCTGAAGCATGAGAACCCAA   |
| deep-Hox-OST8-F1   | TCAGTATTGGGGCAGAGGTC    |

|                   |                           |
|-------------------|---------------------------|
| deep-Hox-OST8-R1  | CCAGCTTGGATCACCACAGA      |
| deep-Hox-OST9-F1  | CTGAAACCTCAGCCCAGCAG      |
| deep-Hox-OST9-R1  | ACTGTGACAGGAAGCAGCTTTT    |
| deep-Hox-OST10-F1 | CCTCTGCGATCCTCTCCTAGA     |
| deep-Hox-OST10-R1 | TGTGCCTTTCCGGTAGTCAG      |
| deep-Ar1-on-F1    | GGAAGCCATTGAGCCAGGAG      |
| deep-Ar1-on-R1    | GCTGCATGAAGTAACGAGTGC     |
| deep-Ar1-OST1-F1  | ACCCTGCTTCTATGAAGGTGC     |
| deep-Ar1-OST1-R1  | TCAAACAACCAGAACCCCCAG     |
| deep-Ar1-OST2-F1  | TTCCCTGGGCATCAAGTCTC      |
| deep-Ar1-OST2-R1  | GGAAGGAGATGACAACCCCATATA  |
| deep-Ar1-OST3-F1  | AGCACTGATTACCACTTGACCA    |
| deep-Ar1-OST3-R1  | AGTGCTCTTTCCACTCCTGC      |
| deep-Ar1-OST4-F1  | CCAGAGCTCCCAGGGACTAA      |
| deep-Ar1-OST4-R1  | TCCTGGTTTCCCCTCCGTAT      |
| deep-Ar1-OST5-F1  | AGGGGTTTGCAGTGCCATAA      |
| deep-Ar1-OST5-R1  | CTCCCCGCTATAGCATTCCC      |
| deep-Ar1-OST6-F1  | GGCTAGCCTGCTATTATCCG      |
| deep-Ar1-OST6-R1  | TGGAGTCCATCCCAGGAACA      |
| deep-Ar1-OST7-F1  | TGTGGCAGATTTTCAGCATGG     |
| deep-Ar1-OST7-R1  | CCTAAGAGCCCCGCTTTTCT      |
| deep-Ar1-OST8-F1  | GGAGCTGAAGGGGATTGCAT      |
| deep-Ar1-OST8-R1  | ATCCCCCTTCCCTGAGACAA      |
| deep-Ar1-OST9-F1  | ACCCACTGGGACAGAGATGT      |
| deep-Ar1-OST9-R1  | TGAGCCACCCTTCTGTAGGA      |
| deep-Ar1-OST10-F1 | ACTCTAACTCTGTTGCCTGCC     |
| deep-Ar1-OST10-R1 | TTCCATCCTGATCGATCTCAG     |
| deep-Ar1-OST11-F1 | TTCCTCTACCCTGGGGCATC      |
| deep-Ar1-OST11-R1 | GCCAGAAACCATACACTGGC      |
| deep-Ar15-on-F1   | CAGATTGCAAGAGAGCTGCAT     |
| deep-Ar15-on-R1   | GGAAAGGGAACAAGGTGGGTT     |
| deep-Ar15-OST1-F1 | TCCCACTCTTTGGGGCCTAT      |
| deep-Ar15-OST1-R1 | CCAGCGGGACTTGAAAATC       |
| deep-Ar15-OST2-F1 | TCTGCCAGTACCACATCCCT      |
| deep-Ar15-OST2-R1 | TACTGTCATTGGCCTCGCAG      |
| deep-Ar15-OST3-F1 | TGGGGATATTCCCTCATTTCCCTCC |
| deep-Ar15-OST3-R1 | CCGGGATCTGTTCTGTCACG      |
| deep-Ar15-OST4-F1 | TTGGGCTGGGGGAGTTACTA      |
| deep-Ar15-OST4-R1 | ATCTGTTCCGTTTGTCTGGGG     |
| deep-Ar15-OST5-F1 | GATTCCAGAGCATTCCCCCA      |
| deep-Ar15-OST5-R1 | AGTCAGCTTGTCTTCACCCC      |
| deep-Ar15-OST6-F1 | CAGAGTATGGGGAATGGCTCC     |
| deep-Ar15-OST6-R1 | GGTTGGAGGTCCTACAACACAT    |

|                           |                           |
|---------------------------|---------------------------|
| <b>deep-Ar15-OST7-F1</b>  | TCAGCTGAGCCGCTAACAAA      |
| <b>deep-Ar15-OST7-R1</b>  | TGGGTTGGATGGAGTTTTGGA     |
| <b>deep-Ar15-OST8-F1</b>  | CTAGAGAGGGCCCCCATTTC      |
| <b>deep-Ar15-OST8-R1</b>  | ACGCCCTGGGCTTGTAATA       |
| <b>deep-Ar15-OST9-F1</b>  | TCTGGATTTCTCTGTATCAACTGT  |
| <b>deep-Ar15-OST9-R1</b>  | CAGGTCTTAGCAGCTTGGGT      |
| <b>deep-Ar15-OST10-F1</b> | CCAGACGGCTGACATTTCCCT     |
| <b>deep-Ar15-OST10-R1</b> | AGCTCACCTCTGTCTCTGTGA     |
| <b>deep-Ar15-OST11-F1</b> | ACTCACCTACATAGAGTTAAAGCGG |
| <b>deep-Ar15-OST11-R1</b> | TCTTTGTGTAAAAGCAGTATGGGA  |
| <b>deep-Ar15-OST12-F1</b> | TGCCTGGGGTATTGCAATGTT     |
| <b>deep-Ar15-OST12-R1</b> | AGCTGTGACATGGGAGGAAAC     |
